# Supplementary material for: Photoinduced charge separation in pyrenedicarboxamide-linked DNA hairpins
Source: Royal Society of Chemistry journal article supplement (doi:10.1039/b813995d), 2008-10-27

Supporting Information for:

**Photoinduced Charge Separation in Pyrenedicarboxamide-Linked DNA Hairpins**

Pierre Daublain,<sup>†</sup> Karsten Siegmund,<sup>†</sup> Mahesh Hariharan,<sup>†</sup> Josh Vura-Weis,<sup>†</sup> Michael R. Wasielewski,<sup>†</sup> Frederick D. Lewis,<sup>\*†</sup> Vladimir Shafirovich,<sup>\*§</sup> Qiang Wang,<sup>‡</sup> Milen Raytchev,<sup>‡</sup> and Torsten Fiebig,<sup>\*‡</sup>

Contents

**Table 1.** MALDI-TOF-MS data for Pyd conjugates.

**Figure S1:** 1D <sup>1</sup>H spectrum of Pyd-4G in D<sub>2</sub>O, 10mM NaCl, 100mM sodiumphosphate buffer.

**Figure S2.** Transient absorption spectra of conjugate Pyd-2G in aqueous buffer, (a) 0-10 ps and (b) 0.2-1.9 ns. Early spectra are shown in blue/green and late spectra in orange/red.

**Figure S3.** Transient absorption spectra of conjugate Pyd-3G in aqueous buffer, 0-5.1 ns.

**Figure S4.** Single wavelength transient intensities for conjugate Pyd-2G in aqueous buffer.

**Table 1.** MALDI-TOF-MS data for Pyd conjugates.

Pyd-1G: d(TTTTTG-Pyd-CAAAAA) MALDI-TOF MS  $m/z$  for  $C_{63}H_{84}N_{35}O_{36}P_5$   $[M-H]^-$

: calcd 4107.9, found 4112.7

Pyd-2G d(TTTTGT-Pyd-ACAAAA) MALDI-TOF MS  $m/z$  for  $C_{63}H_{84}N_{35}O_{36}P_5$   $[M-H]^-$ :

calcd 4108.9, found 4114.0

Pyd-3G d(TTTGTT-Pyd-AACAAA) MALDI-TOF MS  $m/z$  for  $C_{63}H_{84}N_{35}O_{36}P_5$   $[M-H]^-$ :

calcd 4108.9, found 4114.2

Pyd-4G d(TTGTTT-Pyd-AAACAA) MALDI-TOF MS  $m/z$  for  $C_{63}H_{84}N_{35}O_{36}P_5$   $[M-H]^-$ :

calcd 4108.9, found 4114.1

Pyd-AT d(TTTTTT-Pyd-AAAAAA) MALDI-TOF MS  $m/z$  for  $C_{63}H_{84}N_{35}O_{36}P_5$   $[M-H]^-$ :

calcd 4108.9, found 4112.9

**Figure S1:** 1D  $^1\text{H}$  spectrum of Pyd-4G in  $\text{D}_2\text{O}$ , 10mM NaCl, 100mM sodiumphosphate buffer.

Pyd-4G TTGTTT-Py-AAACAA

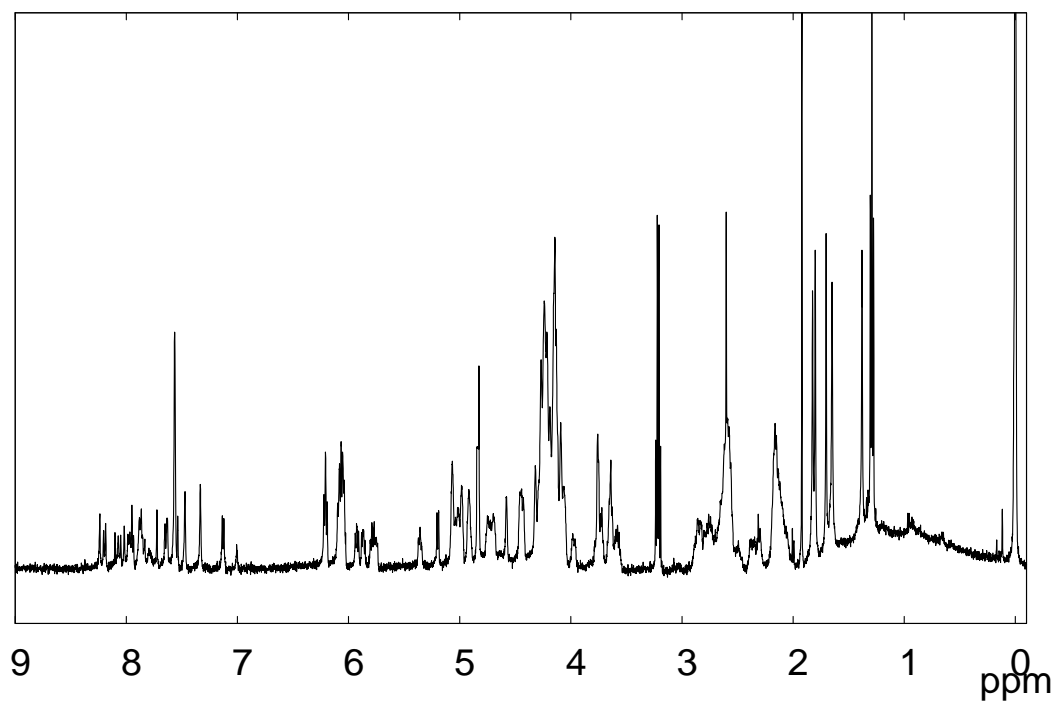

S1a: Methyl region of the spectrum in S1

Pyd-4G TTGTTT-Py-AAACAA

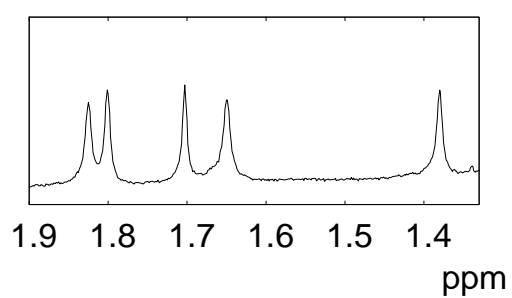

**Figure S2.** Transient absorption spectra of conjugate Pyd-2G in aqueous buffer, (a) 0-10 ps and (b) 0.2-1.9 ns. Early spectra are shown in blue/green and late spectra in orange/red.

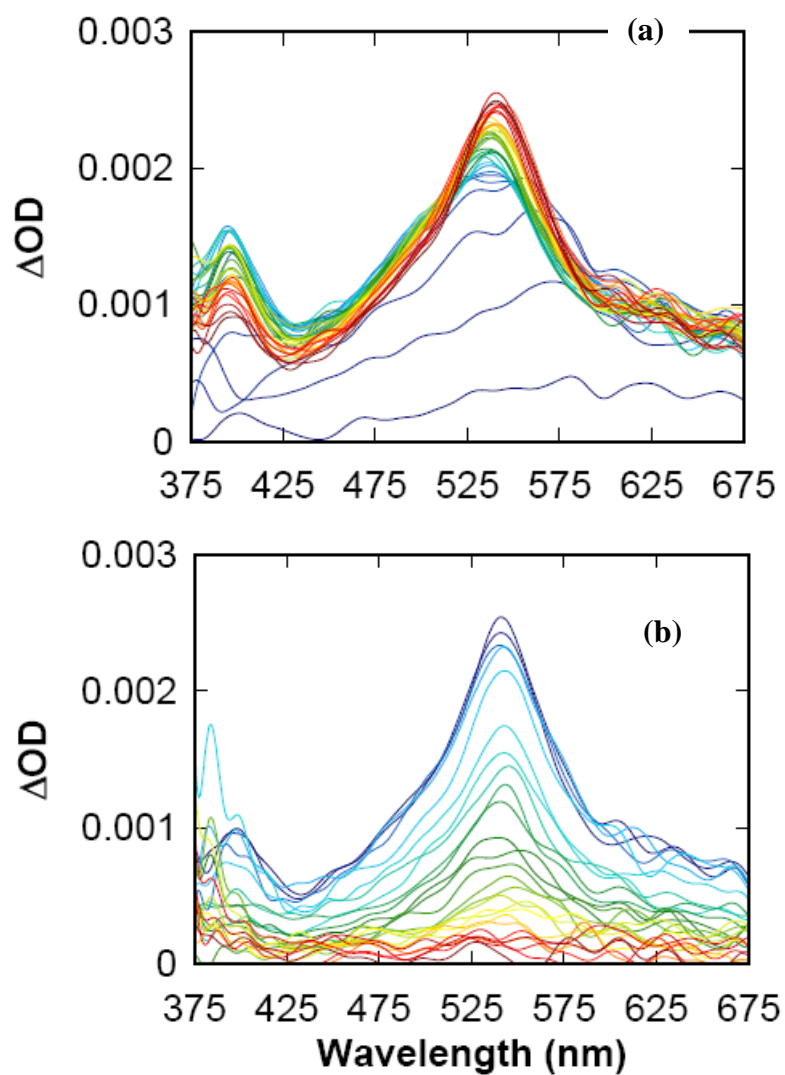

**Figure S3.** Transient absorption spectra of conjugate Pyd-3G in aqueous buffer, 0-5.1 ns.

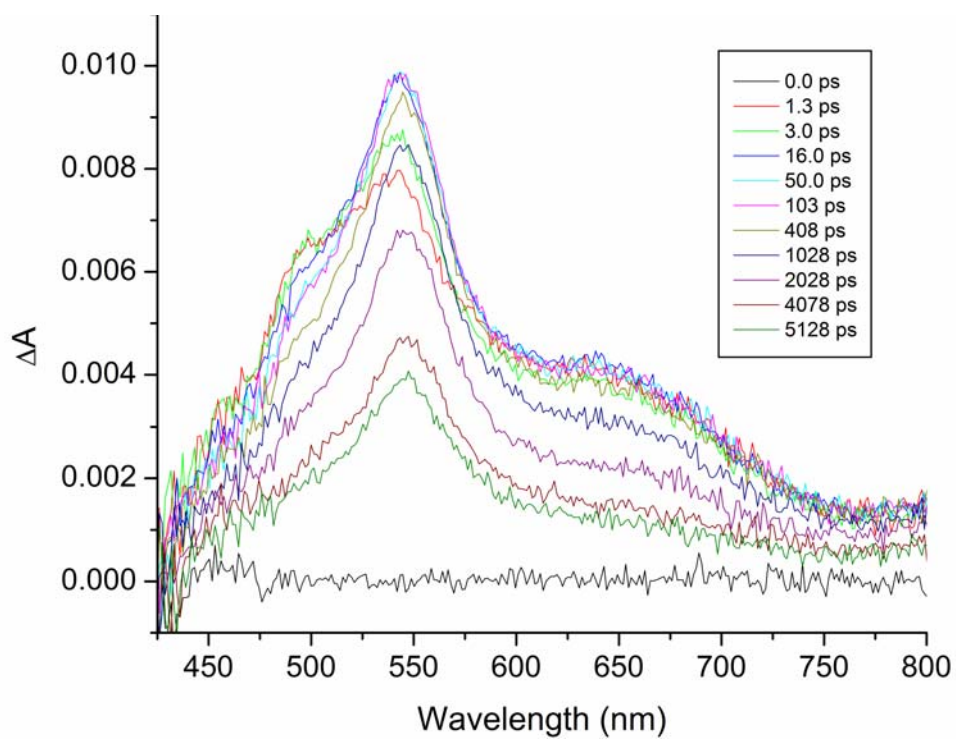

**Figure S4.** Single wavelength transient intensities for conjugate Pyd-2G in aqueous buffer.

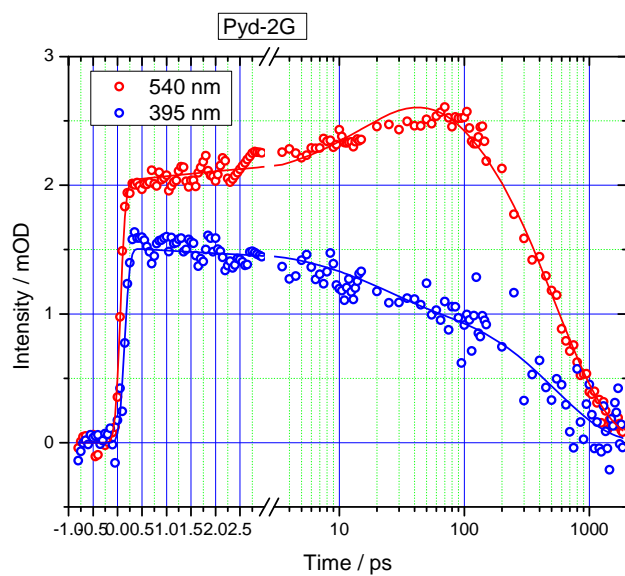

Supplement: b813995d.pdf [file b813995d.pdf]
